# Supplementary material for: Defining blood-induced microglia functions in neurodegeneration through multiomic profiling
Source: PubMed Central journal article supplement (PMC10307624; doi:10.1038/s41590-023-01522-0), 2023-06-08

**Full, uncropped immunoblots for Fig. 4.**

**Fig. 4f uncropped and unprocessed immunoblots**

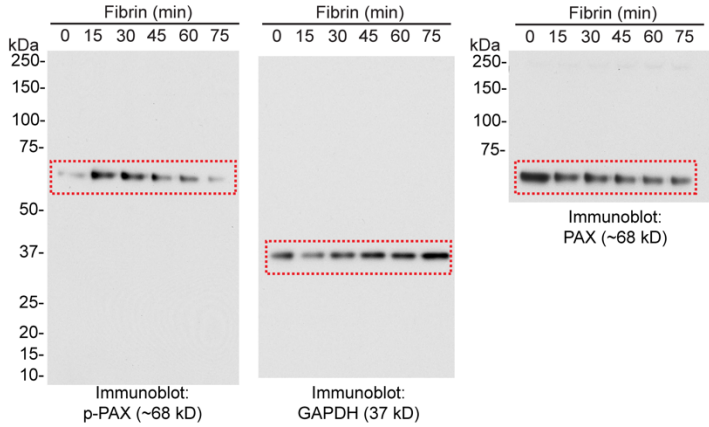

**Fig. 4g uncropped and unprocessed immunoblots**

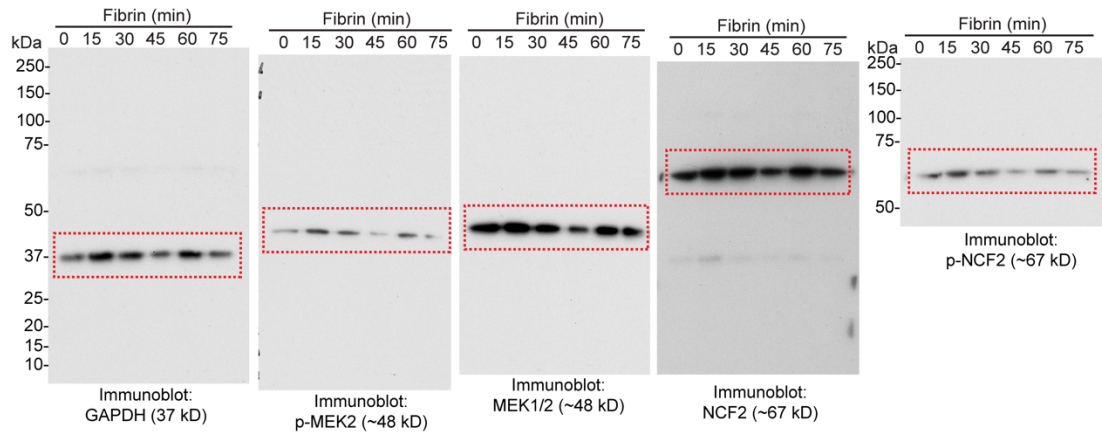

**Fig. 4i uncropped and unprocessed immunoblots**

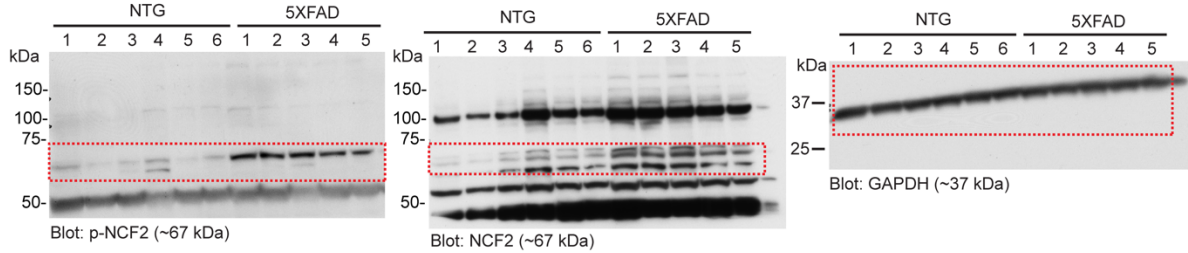

Supplement: 41590_2023_1522_MOESM6_ESM.pdf [file 41590_2023_1522_MOESM6_ESM.pdf]
